# Supplementary material for: Clinical Characteristics of Patients with Severe and Critical COVID-19 in Wuhan: A Single-Center, Retrospective Study
Source: Springer Nature journal article supplement (doi:10.1007/s40121-020-00379-2), 2021-01-22
Supplement: MOESM1 [file 18791784]

Supplementary Figure Legend:

Supplementary Figure 1: Temporal changes in coagulation related indicators from illness onset in critical COVID-19 patients with different course of disease. A: APTT, activated partial thromboplastin time; B: PT, prothrombin time; C: D-Dimer; D: Platelet. \*:  $P < 0.05$ ; \*\*:  $P < 0.01$ ; \*\*\*:  $P < 0.001$ ; \*\*\*\*:  $P < 0.0001$ ; ns:  $P \geq 0.05$ .

Supplementary Figure 2: Temporal changes in laboratory markers from illness onset in critical COVID-19 patients with different course of disease. A: CRP, C-reactive protein; B: HB, hemoglobin; C: ALB, albumin; D: BUN, blood urea nitrogen; E: Scr, serum creatinine. \*:  $P < 0.05$ ; \*\*:  $P < 0.01$ ; \*\*\*:  $P < 0.001$ ; \*\*\*\*:  $P < 0.0001$ ; ns:  $P \geq 0.05$ .

# Supplementary Figure 1

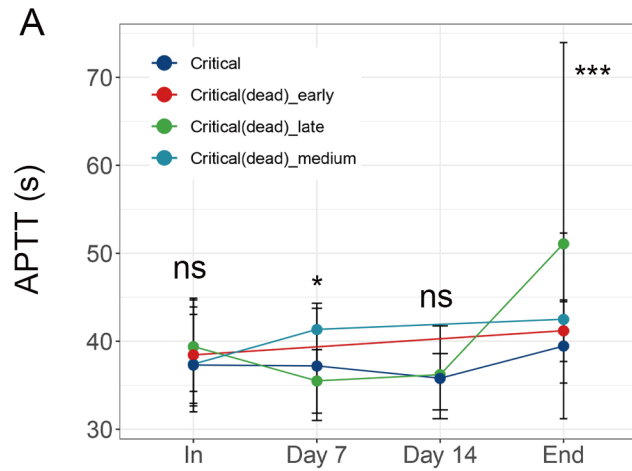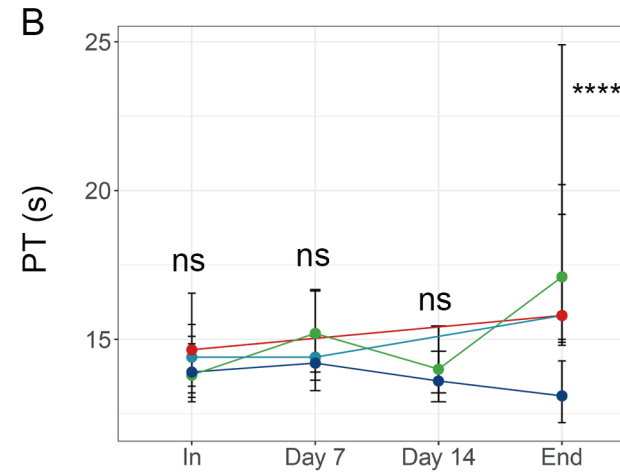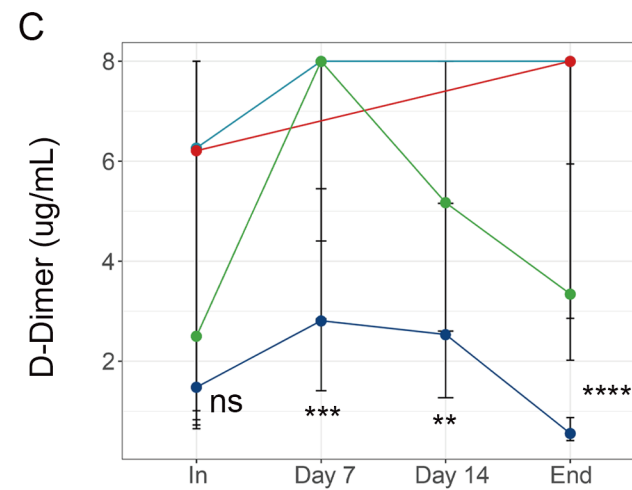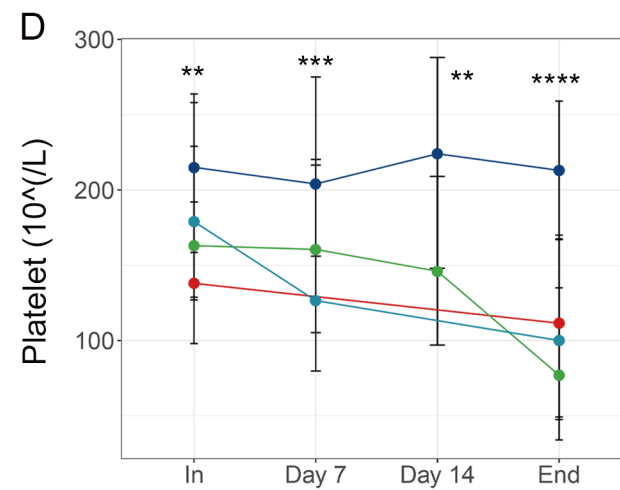

# Supplementary Figure 2

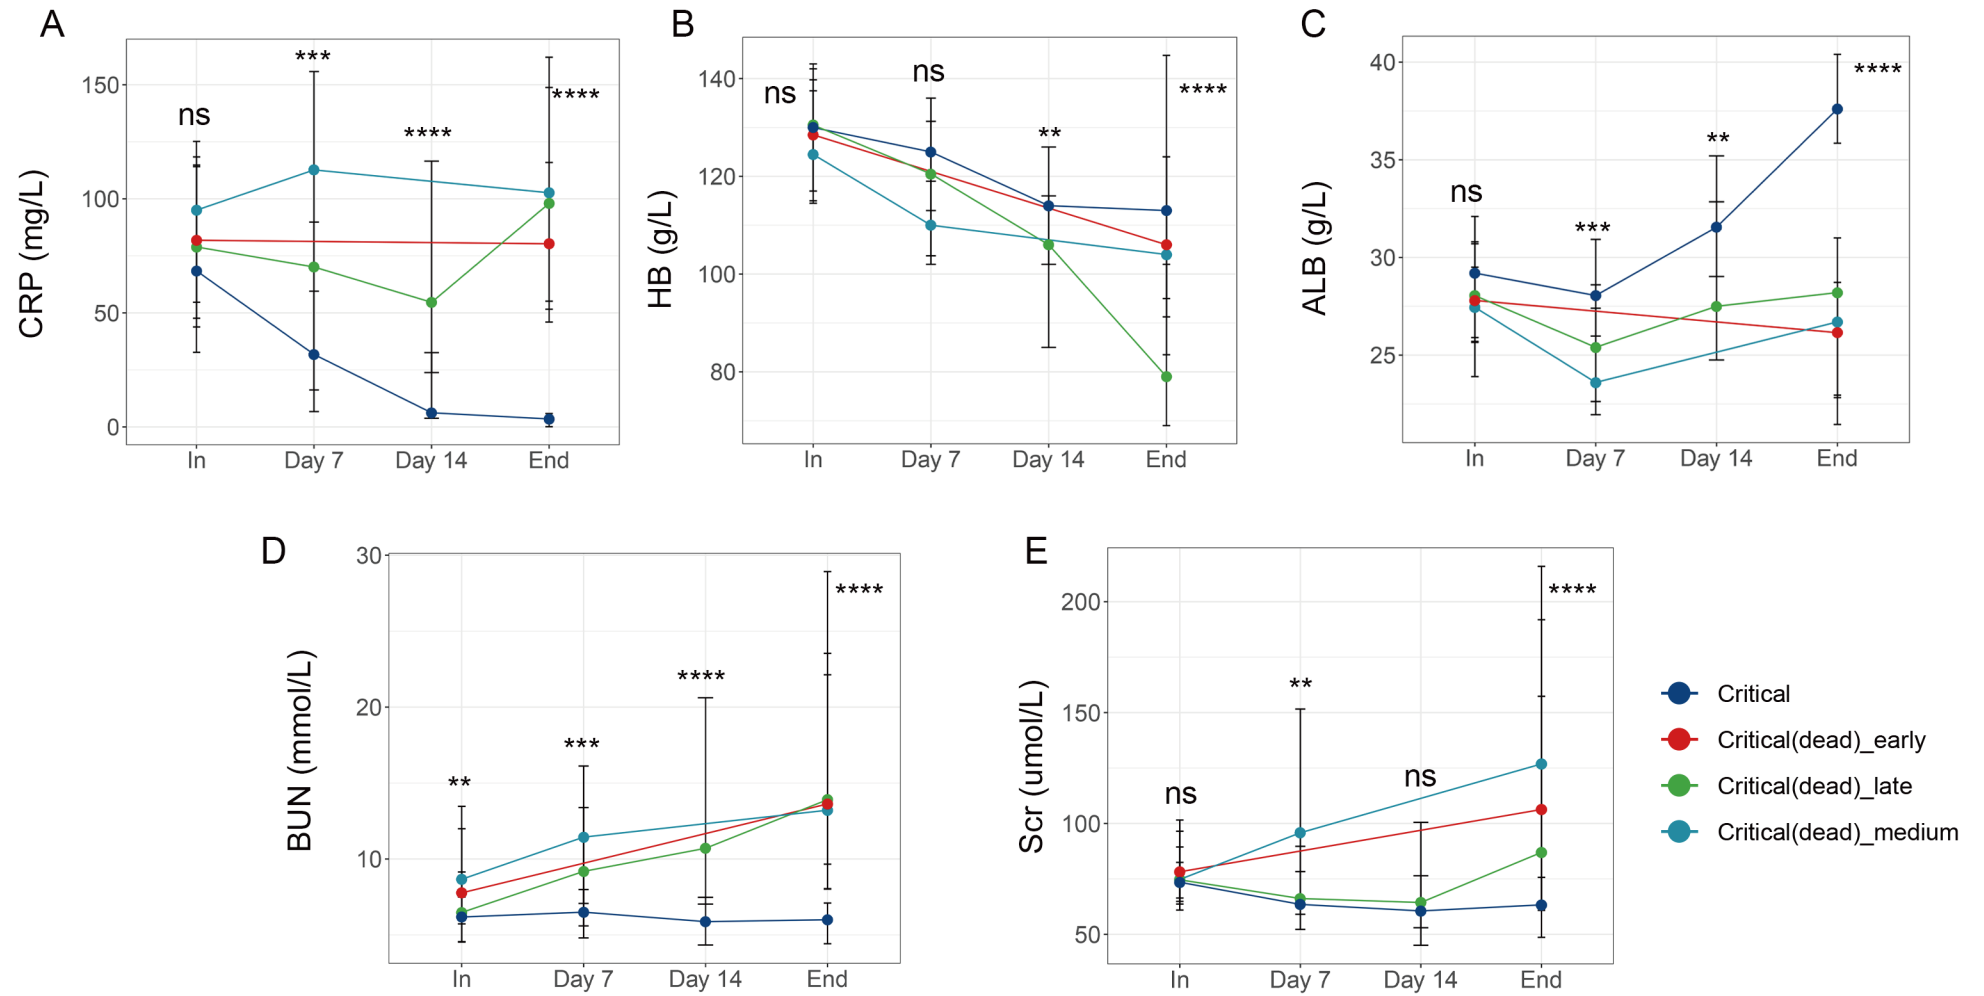

**Supplementary Table 1: Laboratory information of the whole cohort at admission**

|                                | Total (n=753)     | Moderate (n=32)      | Severe(n=493)     | Critical (n=47)     | Critical(dead)_early<br>(n=66) | Critical(dead)_medium<br>(n=51) | Critical(dead)_late<br>(n=64) | P-value |
|--------------------------------|-------------------|----------------------|-------------------|---------------------|--------------------------------|---------------------------------|-------------------------------|---------|
| <b>Blood routine</b>           |                   |                      |                   |                     |                                |                                 |                               |         |
| WBC count, 10 <sup>9</sup> /L  | 5.97(4.58-8.05)   | 5.3(4.54-6.16)       | 5.5(4.36-6.97)    | 8.27(4.98-10.12)    | 9.36(6.55-11.73)               | 8.5(6.48-12.93)                 | 7.65(5.2-10.63)               | <0.0001 |
| Hemoglobin, g/dL               | 126(115-137)      | 129.5(119.75-138.25) | 125(115-136)      | 130(117-142)        | 128.5(117-139.75)              | 124.5(114.5-137.5)              | 130.5(115-143)                | 0.406   |
| Platelet, 10 <sup>9</sup> /L   | 209.5(155-269.25) | 233(178.75-260.5)    | 218.5(165-279.25) | 215(158.5-258)      | 138(98-192)                    | 179(127-263.75)                 | 163(128.75-229)               | <0.0001 |
| Neutrophil, 10 <sup>9</sup> /L | 4.08(2.97-6.56)   | 3.2(2.7-3.94)        | 3.68(2.76-5.08)   | 6.93(3.82-9.07)     | 8.02(5.49-10.71)               | 7.22(5.28-11.88)                | 6.51(4.33-9.39)               | <0.0001 |
| Lymphocyte, 10 <sup>9</sup> /L | 0.98(0.64-1.43)   | 1.4(0.84-1.83)       | 1.12(0.82-1.56)   | 0.72(0.46-1)        | 0.61(0.38-0.76)                | 0.54(0.39-0.81)                 | 0.53(0.4-0.74)                | <0.0001 |
| <b>Coagulation</b>             |                   |                      |                   |                     |                                |                                 |                               |         |
| D-Dimer, mg/L                  | 0.62(0.29-2.5)    | 0.32(0.19-0.8)       | 0.47(0.24-1.05)   | 1.48(0.72-8)        | 6.21(0.83-8)                   | 6.27(1.01-8)                    | 2.5(0.65-8)                   | <0.0001 |
| PT, s                          | 13.2(12.6-14.2)   | 12.9(12.62-13.73)    | 13(12.4-13.7)     | 13.9(13.2-14.85)    | 14.65(13.43-16.55)             | 14.4(13.05-15.5)                | 13.8(12.9-15.1)               | <0.0001 |
| APTT, s                        | 36.7(33.1-40.75)  | 36.8(35.3-39.88)     | 36.2(33.1-39.8)   | 37.3(32.65-43.05)   | 38.45(31.98-44.9)              | 37.4(32.95-43.9)                | 39.4(34.3-44.7)               | 0.0363  |
| FIB, g/L                       | 4.4(3.25-5.24)    | NA                   | NA                | 4.49(3.5-5.29)      | 3.75(2.16-5.04)                | 4.58(2.89-5.56)                 | 4.53(3.72-5.19)               | 0.0667  |
| <b>Liver</b>                   |                   |                      |                   |                     |                                |                                 |                               |         |
| AST, U/L                       | 32(23-47)         | 23(17.75-31.25)      | 28(21-41)         | 38(28-59)           | 47(35.5-66.75)                 | 46.5(31-66.75)                  | 43(28.75-55)                  | <0.0001 |
| ALT, U/L                       | 33(21-54)         | 21.5(18.75-37.25)    | 32(20-51)         | 40(26-65)           | 41(30-56)                      | 41(25.5-84.25)                  | 33(23.75-49)                  | 0.0007  |
| Total protein, g/L             | 62.6(59.1-66.5)   | 65.1(61.88-67.33)    | 63(59.4-66.95)    | 61.4(58.45-65.25)   | 61.2(57.65-65.65)              | 61.75(56.78-65.18)              | 61.65(58.68-64.08)            | 0.0168  |
| ALB, g/L                       | 31.1(27.7-35.2)   | 35.15(32.1-39.75)    | 32.2(28.8-36.6)   | 29.2(25.7-32.1)     | 27.8(25.65-30.7)               | 27.45(23.9-29.5)                | 28.05(25.9-30.8)              | <0.0001 |
| <b>Renal</b>                   |                   |                      |                   |                     |                                |                                 |                               |         |
| BUN, mmol/L                    | 4.9(3.73-6.81)    | 4.2(3.35-4.84)       | 4.46(3.42-5.76)   | 6.18(4.56-7.5)      | 7.77(5.96-13.46)               | 8.66(5.73-11.99)                | 6.48(4.53-9.14)               | <0.0001 |
| Scr, umol/L                    | 68.75(57.2-82.55) | 67.9(57.08-78.85)    | 65.3(56-78.35)    | 73.5(64.85-82.45)   | 78.2(63.65-101.55)             | 74.75(66.38-96.5)               | 74.6(60.95-89.4)              | <0.0001 |
| Cystatin C, mg/L               | 0.96(0.8-1.29)    | NA                   | NA                | 0.92(0.79-1.08)     | 1.03(0.84-1.36)                | 0.97(0.84-1.35)                 | 0.95(0.77-1.19)               | 0.3397  |
| <b>Myocardial</b>              |                   |                      |                   |                     |                                |                                 |                               |         |
| LDH, U/L                       | 269(197-396.25)   | 185.5(147.75-225.75) | 230(185.75-306)   | 371(266.5-610.5)    | 564.5(466-677.75)              | 513.5(399.25-619.75)            | 445(343.5-588)                | <0.0001 |
| CK, U/L                        | 79(48-167)        | 53.5(41.25-100)      | 69(46-118)        | 122(77-312.75)      | 242(109.5-514)                 | 110.5(58-196.25)                | 108(56-242)                   | <0.0001 |
| <b>Inflammation</b>            |                   |                      |                   |                     |                                |                                 |                               |         |
| CRP, mg/L                      | 28.33(4.73-74.27) | 5.44(2.45-24.41)     | 15.1(3.46-44.8)   | 68.43(32.69-114.09) | 81.83(43.84-114.81)            | 95.03(54.66-125.16)             | 78.9(47.64-118.36)            | <0.0001 |
| PCT, ng/mL                     | 0.09(0.05-0.2)    | 0.05(0.04-0.1)       | 0.07(0.05-0.12)   | 0.16(0.11-0.27)     | 0.42(0.21-1.17)                | 0.44(0.14-1.05)                 | 0.25(0.12-0.44)               | <0.0001 |
| ESR, mm/h                      | 44(26-68)         | 28(21-47)            | 38(23-64.5)       | 72(44.5-81.5)       | 62(46-72)                      | 62(24.05-79)                    | 72(46-105)                    | 0.0003  |
| Serum Ferritin, ng/mL          | 577.27(271.89-    | 116.89(107.76-       | 474.81(210.65-    | 593.32(398.2-       | 1809.36(690.67-                | 1419.64(1183.98-                | 1316.72(998.44-               | <0.0001 |

---

1191.77)

396.18)

777.4)

1909.33)

2000)

2000)

1793.2)

---

WBC, white blood cell; PT, prothrombin time; APTT, activated partial thromboplastin time; FIB, fibrinogen; ALB, albumin; BUN, blood urea nitrogen; Scr, serum creatinine; LDH, lactate dehydrogenase; CK, creatine kinase; CRP, C-reactive protein; PCT, procalcitonin; ESR, erythrocyte sedimentation rate.

The P-value referring to the comparison of the 5 groups (Severe, Critical, Critical(dead)\_early, Critical(dead)\_medium, Critical(dead)\_late). A P-value of <0.05 is statistically significant.

**Supplementary Table 2: Demographic and clinical findings between different groups of non-survivors**

|                      | Early (n=66)  | Medium (n=51) | Late (n=64)    | P-value | early vs.<br>medium | early vs.<br>late | medium vs.<br>late |
|----------------------|---------------|---------------|----------------|---------|---------------------|-------------------|--------------------|
| Age                  | 68.5(60.5-78) | 68(62.5-72)   | 68.5(61.75-77) | 0.9642  |                     |                   |                    |
| <b>Sex</b>           |               |               |                |         |                     |                   |                    |
| Male                 | 43(65.2%)     | 35(68.6%)     | 48(75%)        |         |                     |                   |                    |
| Female               | 23(34.8%)     | 16(31.4%)     | 16(25%)        | 0.4671  |                     |                   |                    |
| <b>Comorbidities</b> |               |               |                |         |                     |                   |                    |
| Total                | 52(78.8%)     | 39(76.5%)     | 50(78.1%)      | 0.9547  |                     |                   |                    |
| Diabetes             | 16(24.2%)     | 16(31.4%)     | 11(17.2%)      | 0.2053  |                     |                   |                    |
| Hypertension         | 33(50%)       | 20(39.2%)     | 31(48.4%)      | 0.4702  |                     |                   |                    |
| Cancer               | 10(15.2%)     | 2(3.9%)       | 8(12.5%)       | 0.142   |                     |                   |                    |
| Cardiac Disease      | 11(16.7%)     | 7(13.7%)      | 16(25%)        | 0.2631  |                     |                   |                    |
| <b>Symptoms</b>      |               |               |                |         |                     |                   |                    |
| Fever                | 51(77.3%)     | 43(84.3%)     | 52(81.2%)      | 0.6262  |                     |                   |                    |
| Cough                | 41(62.1%)     | 34(66.7%)     | 51(79.7%)      | 0.0808  |                     |                   |                    |
| Fatigue              | 36(54.5%)     | 29(56.9%)     | 38(59.4%)      | 0.8568  |                     |                   |                    |
| Dyspnea              | 44(66.7%)     | 22(43.1%)     | 34(53.1%)      | 0.0365  | 0.0436              | 0.228             | 0.3488             |
| Chest tightness      | 15(22.7%)     | 12(23.5%)     | 26(40.6%)      | 0.0459  | 1                   | 0.0377            | 0.0723             |
| Anorexia             | 17(25.8%)     | 13(25.5%)     | 17(26.6%)      | 0.9904  |                     |                   |                    |
| Asthma               | 18(27.3%)     | 11(21.6%)     | 15(23.4%)      | 0.7597  |                     |                   |                    |
| Myalgia              | 9(13.6%)      | 13(25.5%)     | 19(29.7%)      | 0.0779  |                     |                   |                    |
| Diarrhea             | 12(18.2%)     | 7(13.7%)      | 13(20.3%)      | 0.6492  |                     |                   |                    |
| Shiver               | 8(12.1%)      | 10(19.6%)     | 12(18.8%)      | 0.4712  |                     |                   |                    |
| <b>Complications</b> |               |               |                |         |                     |                   |                    |
| ARDS                 | 66(100%)      | 51(100%)      | 64(100%)       | -       |                     |                   |                    |
| Hypoproteinemia      | 45(68.2%)     | 49(96.1%)     | 64(100%)       | <0.0001 | 0.0002              | <0.0001           | 0.1945             |
| Shock                | 66(100%)      | 51(100%)      | 64(100%)       | -       |                     |                   |                    |
| Liver Injury         | 44(66.7%)     | 41(80.4%)     | 57(89.1%)      | 0.0075  | 0.214               | 0.0086            | 0.2901             |
| Heart Injury         | 34(51.5%)     | 28(54.9%)     | 41(64.1%)      | 0.3325  |                     |                   |                    |
| Thrombocytopenia     | 23(34.8%)     | 32(62.7%)     | 49(76.6%)      | <0.0001 | 0.0046              | <0.0001           | 0.1496             |
| Anemia               | 15(22.7%)     | 25(49%)       | 52(81.2%)      | <0.0001 | 0.0035              | <0.0001           | 0.0005             |

|                              |           |           |           |         |         |          |        |
|------------------------------|-----------|-----------|-----------|---------|---------|----------|--------|
| DIC                          | 12(18.2%) | 19(37.3%) | 36(56.2%) | <0.0001 | 0.0505  | <0.0001  | 0.06   |
| Coagulation disorders        | 12(18.2%) | 20(39.2%) | 42(65.6%) | <0.0001 | 0.0132  | <0.0001  | 0.0121 |
| AKI                          | 10(15.2%) | 24(47.1%) | 29(45.3%) | 0.0001  | 0.0004  | 0.0004   | 1      |
| Infection                    | 5(7.6%)   | 10(19.6%) | 24(37.5%) | 0.0002  | 0.0917  | 0.0001   | 0.0626 |
| Venous thrombosis            | 2(3%)     | 3(5.9%)   | 9(14.1%)  | 0.0528  |         |          |        |
| Gastrointestinal hemorrhage  | 4(6.1%)   | 4(7.8%)   | 7(10.9%)  | 0.5959  |         |          |        |
| Arrhythmia                   | 4(6.1%)   | 0(0%)     | 1(1.6%)   | 0.1073  |         |          |        |
| AMI                          | 3(4.5%)   | 1(2%)     | 1(1.6%)   | 0.5363  |         |          |        |
| <b>Treatment</b>             |           |           |           |         |         |          |        |
| Oxygen inhalation            | 47(71.2%) | 42(82.4%) | 51(79.7%) | 0.3092  |         |          |        |
| Non-invasive ventilation     | 37(56.1%) | 30(58.8%) | 39(60.9%) | 0.852   |         |          |        |
| Invasive ventilation         | 10(15.2%) | 30(58.8%) | 50(78.1%) | <0.0001 | <0.0001 | <0.0001  | 0.0406 |
| ECMO                         | 0(0%)     | 1(2%)     | 2(3.1%)   | 0.3703  |         |          |        |
| CRRT                         | 4(6.1%)   | 12(23.5%) | 21(32.8%) | 0.0006  | 0.0188  | 3.00E-04 | 0.3055 |
| <b>Drug</b>                  |           |           |           |         |         |          |        |
| Antibiotics                  | 54(81.8%) | 51(100%)  | 62(96.9%) | 0.0003  | 0.0032  | 0.0132   | 0.5021 |
| Anticoagulation              | 11(16.7%) | 24(47.1%) | 52(81.2%) | <0.0001 | 0.0005  | 0        | 0.0002 |
| <b>Anti-virus</b>            |           |           |           |         |         |          |        |
| Arbidol                      | 51(77.3%) | 41(80.4%) | 56(87.5%) | 0.3058  |         |          |        |
| Recombinant human interferon | 9(13.6%)  | 19(37.3%) | 21(32.8%) | 0.0075  | 0.0127  | 0.0184   | 0.6949 |
| Lopinavir and Ritonavir      | 11(16.7%) | 23(45.1%) | 32(50%)   | 0.0001  | 0.0015  | 0.0002   | 0.7075 |
| <b>Corticosteroids</b>       |           |           |           |         |         |          |        |
| Total                        | 42(63.6%) | 43(84.3%) | 53(82.8%) | 0.0103  | 0.0309  | 0.0309   | 1      |
| Dexamethasone                | 7(10.6%)  | 6(11.8%)  | 1(1.6%)   | 0.0693  |         |          |        |
| Methylprednisolone           | 33(50%)   | 36(70.6%) | 40(62.5%) | 0.0705  |         |          |        |
| <b>Others</b>                |           |           |           |         |         |          |        |
| Albumin                      | 20(30.3%) | 45(88.2%) | 60(93.8%) | <0.0001 | <0.0001 | <0.0001  | 0.3348 |
| Gamma-globulin               | 19(28.8%) | 30(58.8%) | 44(68.8%) | <0.0001 | 0.002   | <0.0001  | 0.3284 |

ARDS, acute respiratory distress syndrome; DIC, disseminated intravascular coagulation; AKI, acute kidney injury; AMI: acute myocardial infarction; ECOM, extracorporeal membrane oxygenation; CRRT, continuous renal replacement therapy. A P-value of <0.05 is statistically significant.

**Supplementary Table 3: Laboratory findings between different groups of non-survivors**

|                                | Total (n=753)          | Early (n=66)         | Medium (n=51)         | Late (n=64)            | P-value | early vs.<br>medium | early vs.<br>late | medium vs.<br>late |
|--------------------------------|------------------------|----------------------|-----------------------|------------------------|---------|---------------------|-------------------|--------------------|
| <b>Blood routine</b>           |                        |                      |                       |                        |         |                     |                   |                    |
| WBC count, 10 <sup>9</sup> /L  | 5.97(4.58-8.05)        | 9.36(6.55-11.73)     | 8.5(6.48-12.93)       | 7.65(5.2-10.63)        | 0.1005  |                     |                   |                    |
| Hemoglobin, g/dL               | 126(115-137)           | 128.5(117-139.75)    | 124.5(114.5-137.5)    | 130.5(115-143)         | 0.5524  |                     |                   |                    |
| Platelet, 10 <sup>9</sup> /L   | 209.5(155-269.25)      | 138(98-192)          | 179(127-263.75)       | 163(128.75-229)        | 0.0656  |                     |                   |                    |
| Neutrophil, 10 <sup>9</sup> /L | 4.08(2.97-6.56)        | 8.02(5.49-10.71)     | 7.22(5.28-11.88)      | 6.51(4.33-9.39)        | 0.1375  |                     |                   |                    |
| Lymphocyte, 10 <sup>9</sup> /L | 0.98(0.64-1.43)        | 0.61(0.38-0.76)      | 0.54(0.39-0.81)       | 0.53(0.4-0.74)         | 0.8828  |                     |                   |                    |
| <b>Coagulation</b>             |                        |                      |                       |                        |         |                     |                   |                    |
| D-Dimer, mg/L                  | 0.62(0.29-2.5)         | 6.21(0.83-8)         | 6.27(1.01-8)          | 2.5(0.65-8)            | 0.1175  |                     |                   |                    |
| PT, s                          | 13.2(12.6-14.2)        | 14.65(13.43-16.55)   | 14.4(13.05-15.5)      | 13.8(12.9-15.1)        | 0.0394  | 0.033               | 0.6805            | 0.6987             |
| APTT, s                        | 36.7(33.1-40.75)       | 38.45(31.98-44.9)    | 37.4(32.95-43.9)      | 39.4(34.3-44.7)        | 0.8362  |                     |                   |                    |
| FIB, g/L                       | 4.4(3.25-5.24)         | 3.75(2.16-5.04)      | 4.58(2.89-5.56)       | 4.53(3.72-5.19)        | 0.0517  |                     |                   |                    |
| <b>Liver</b>                   |                        |                      |                       |                        |         |                     |                   |                    |
| AST, U/L                       | 32(23-47)              | 47(35.5-66.75)       | 46.5(31-66.75)        | 43(28.75-55)           | 0.2125  |                     |                   |                    |
| ALT, U/L                       | 33(21-54)              | 41(30-56)            | 41(25.5-84.25)        | 33(23.75-49)           | 0.0891  |                     |                   |                    |
| Total protein, g/L             | 62.6(59.1-66.5)        | 61.2(57.65-65.65)    | 61.75(56.78-65.18)    | 61.65(58.68-64.08)     | 0.9262  |                     |                   |                    |
| ALB, g/L                       | 31.1(27.7-35.2)        | 27.8(25.65-30.7)     | 27.45(23.9-29.5)      | 28.05(25.9-30.8)       | 0.4333  |                     |                   |                    |
| <b>Renal</b>                   |                        |                      |                       |                        |         |                     |                   |                    |
| BUN, mmol/L                    | 4.9(3.73-6.81)         | 7.77(5.96-13.46)     | 8.66(5.73-11.99)      | 6.48(4.53-9.14)        | 0.041   | 0.0657              | 1                 | 0.1353             |
| Scr, umol/L                    | 68.75(57.2-82.55)      | 78.2(63.65-101.55)   | 74.75(66.38-96.5)     | 74.6(60.95-89.4)       | 0.4765  |                     |                   |                    |
| Cystatin C, mg/L               | 0.96(0.8-1.29)         | 1.03(0.84-1.36)      | 0.97(0.84-1.35)       | 0.95(0.77-1.19)        | 0.432   |                     |                   |                    |
| <b>Myocardial</b>              |                        |                      |                       |                        |         |                     |                   |                    |
| LDH, U/L                       | 269(197-396.25)        | 564.5(466-677.75)    | 513.5(399.25-619.75)  | 445(343.5-588)         | 0.0113  | 0.0113              | 0.0084            | 0.605              |
| CK, U/L                        | 79(48-167)             | 242(109.5-514)       | 110.5(58-196.25)      | 108(56-242)            | 0.0072  | 0.0072              | 0.0193            | 0.0222             |
| <b>Inflammation</b>            |                        |                      |                       |                        |         |                     |                   |                    |
| CRP, mg/L                      | 28.33(4.73-74.27)      | 81.83(43.84-114.81)  | 95.03(54.66-125.16)   | 78.9(47.64-118.36)     | 0.5355  |                     |                   |                    |
| PCT, ng/mL                     | 0.09(0.05-0.2)         | 0.42(0.21-1.17)      | 0.44(0.14-1.05)       | 0.25(0.12-0.44)        | 0.0468  | 0.0627              | 1                 | 0.2334             |
| ESR, mm/h                      | 44(26-68)              | 62(46-72)            | 62(24.05-79)          | 72(46-105)             | 0.4413  |                     |                   |                    |
| Serum Ferritin, ng/mL          | 577.27(271.89-1191.77) | 1809.36(690.67-2000) | 1419.64(1183.98-2000) | 1316.72(998.44-1793.2) | 0.5404  |                     |                   |                    |

WBC, white blood cell; PT, prothrombin time; APTT, activated partial thromboplastin time; FIB, fibrinogen; ALB, albumin; BUN, blood urea nitrogen; Scr, serum creatinine; LDH, lactate dehydrogenase; CK, creatine kinase; CRP, C-reactive protein; PCT, procalcitonin; ESR, erythrocyte sedimentation rate. A P-value of <0.05 is statistically significant.
